# Supplementary material for: Scalable High-Speed Hybrid Complementary Integrated Circuits based on Solution-Processed Organic and Inorganic Transistors
Source: Research Square preprint supplement (doi:10.21203/rs.3.rs-275079/v1), 2021-03-10
Supplement: Supplementary file 1 [file 967e6ce9ac6274dc0a94f6b3.docx]

**Scalable High-Speed Hybrid Complementary Integrated Circuits based on Solution-Processed Organic and Inorganic Transistors**

*Xiaozhu Wei, Shohei Kumagai,* Tatsuyuki Makita, Kotaro Tsuzuku, Akifumi Yamamura, Mari Sasaki, Shun Watanabe,* and Jun Takeya*

**Supplementary information**

**Figure S1** Schematic of the process flow and cross section of the hybrid complementary inverter

**Figure S2** Cross-polarized micrograph of C9-DNBDT-NW single crystals on as-fabricated IZO TFTs before OSC patterning

**Figure S3** (a) Optical micrograph of a hybrid complementary inverter. (b) FIB-SEM images of the cross section of the C9-DNBDT-NW channel and a magnified image of the edge of the gate electrode

**Figure S4** Schematic of (a) the structure of the dry-film resist and (b) two-step photolithography

**Section S1** Evaluation of contact resistance in C9-DNBDT-NW TFTs

**Figure S5** Contact resistance of C9-DNBDT-NW-based TFTs fabricated by two-step photolithography. (a) Schematic illustration of contact resistance in a TFT. (b) Optical micrograph of TFTs with channel lengths of 20, 10, 6 and 4 μm. (c) Transfer curves of the corresponding TFTs (*V*D = –1 V). (d) TLM plots at different *V*G values. (e) Dependence of *R*c on *V*G

**Figure S6** Transfer characteristics of (a) C9-DNBDT-NW-based TFT at *V*D = –7 V and (b) IZO-based TFTs *V*D = 7 V

**Figure S7** Transfer characteristics of (a) C9-DNBDT-NW- and (b) IZO-based TFTs before and after exposure to air for 5 months

**Figure S8** Electrical performance of TFTs with dimensions of *L* = 4 μm and *ΔL* = 3 μm for the p-channel and *L* = 8 μm and *ΔL* = 1.5 μm for the n-channel. (a) Output performance. (b)–(e) Transfer curves in the linear and saturation regions of TFTs based on C9-DNBDT-NW and IZO

**Figure S9** Output signals of ring oscillators with different dimensions. (a) ROSC1: *L* = 19 μm and *ΔL* = 9 μm for the p-channel and *L* = 24 μm and *ΔL* = 8 μm for the n-channel. (b) ROSC2: *L* = 9 μm and *ΔL* = 9 μm for the p-channel and *L* = 13 μm and *ΔL* = 8.5 μm for the n-channel. (c) ROSC3: *L* = 4 μm and *ΔL* = 5 μm for the p-channel and *L* = 8 μm and *ΔL* = 3.5 μm for the n-channel. In all ring oscillators, *W* = 200 μm and *V*DD = 10 V

**Figure S10** Schematic illustration of OSC and S/D electrode patterning processes


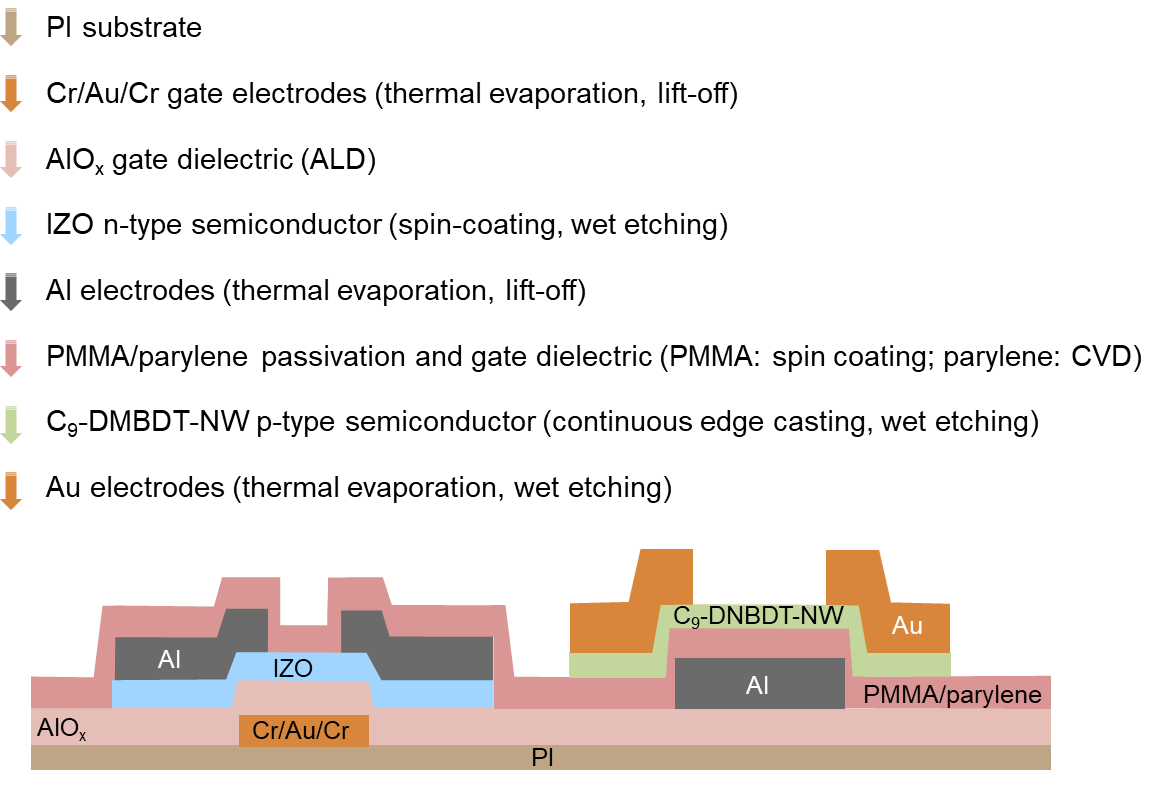


**Figure S1** Schematic of the process flow and cross section of the hybrid complementary inverter


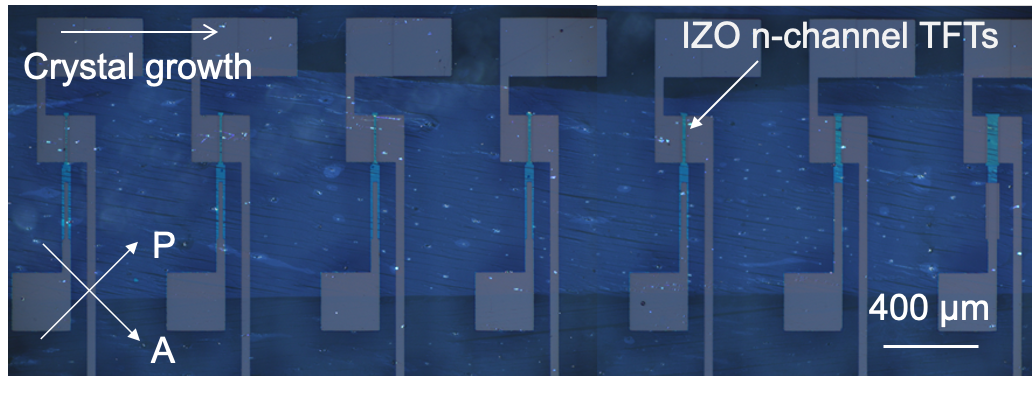


**Figure S2** Cross-polarized micrograph of C9-DNBDT-NW single crystals on as-fabricated IZO TFTs before OSC patterning


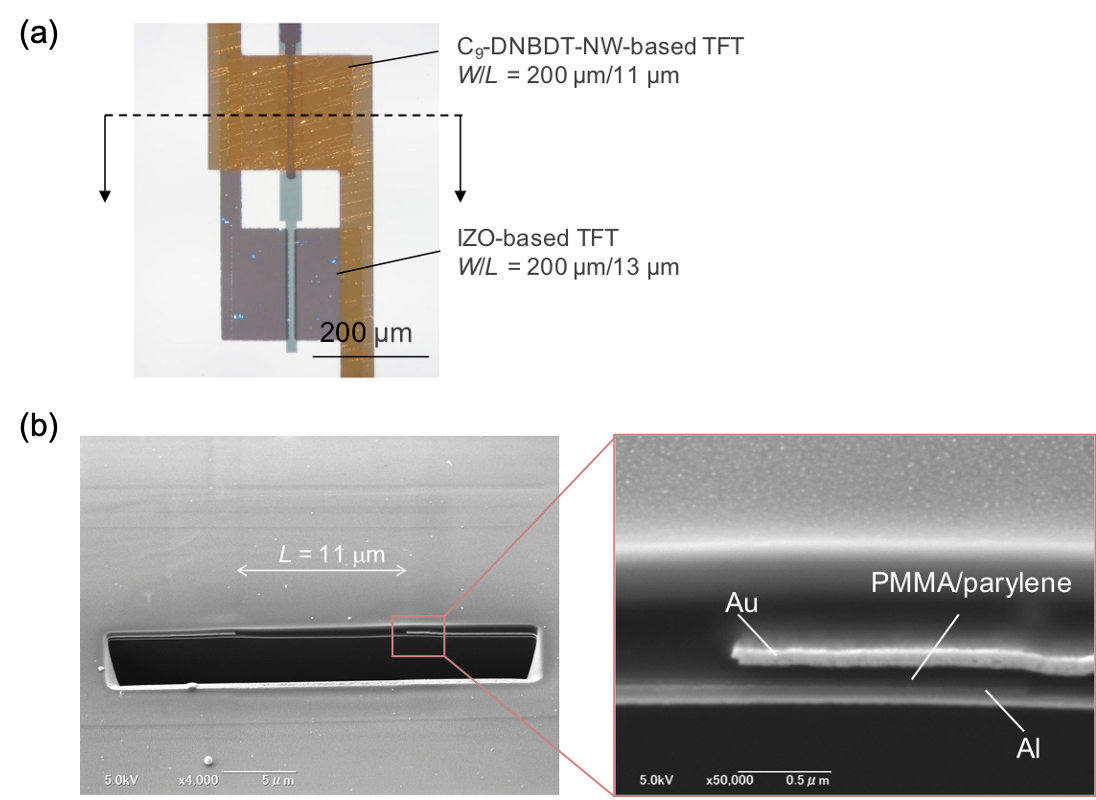


**Figure S3** (a) Optical micrograph of a hybrid complementary inverter. (b) FIB-SEM images of the cross section of the C9-DNBDT-NW channel and a magnified image of the edge of the gate electrode


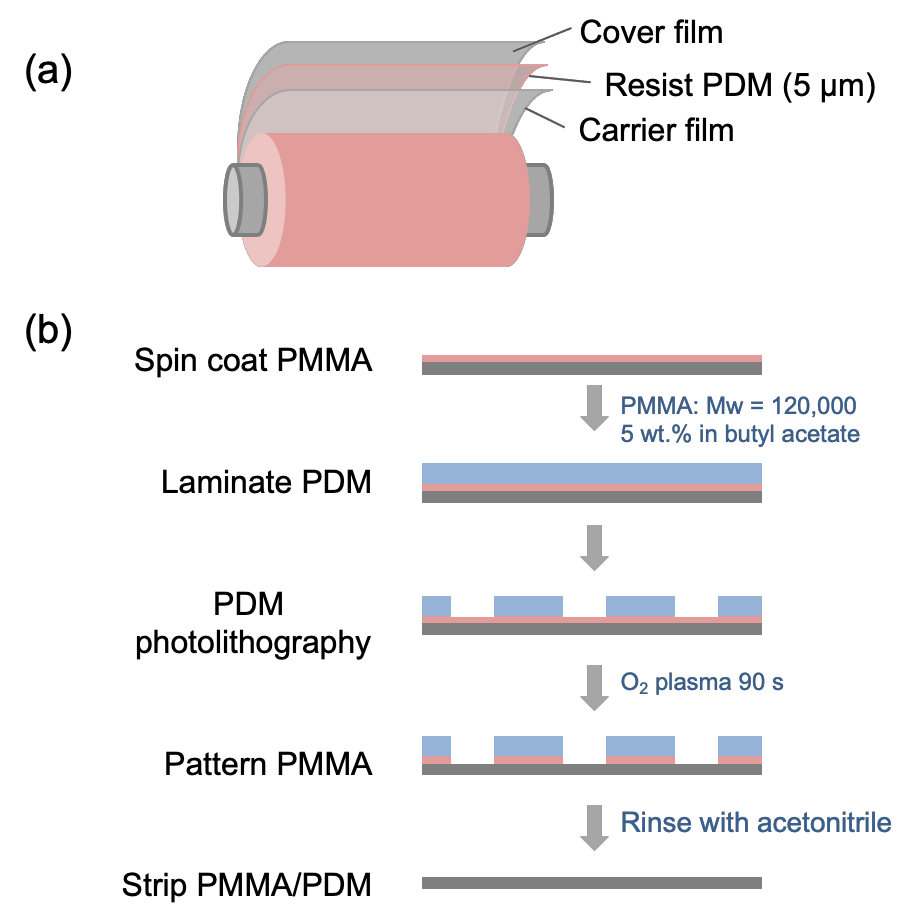


**Figure S4** Schematic of (a) the structure of the dry-film resist and (b) two-step photolithography

**Section S1**

*Evaluation of contact resistance in C9-DNBDT-NW TFTs*

A contact resistance (*R*c), which determines the effectiveness of carrier injection, exists at the interface of the semiconductor and electrode and is affected by parameters such as the electrode work function and electrode/semiconductor interface state. *R*c is often estimated using the transfer line method (TLM), in which the resistances in a TFT can be described as

(S1)

where *R*ch is the channel resistance. If we assume that the accumulated carriers are distributed almost homogeneously in the channel (*V*D << *V*G – *V*th), then

(S2)

where *µ*int is the intrinsic mobility, which represents charge-carrier mobility in the accumulated layer. This, in turn, can be estimated by four-terminal measurement. Combining Equations (S1) and (S2), *R*total can be defined as shown in Equation (S3).

(S3)

The W-normalized contact resistance (*R*c*W*) is widely used to compare the contact resistance of TFTs of different dimensions. Thus, we can convert Equation (S3) as follows.

(S4)

*R*c*W* can be obtained by the linear extrapolation of *R*total*W–L* curves and their slopes yield *μ*int.

The contact resistance of C9-DNBDT-NW TFTs fabricated using this method was studied using TLM. **Figure S5** (a) shows TFTs with channel lengths of 20, 10, 6, and 4 µm, which were used to estimate *R*c*W*. According to the transfer curves in the linear region (**Figure S5** (b), *V*D = –1 V), all TFTs exhibited negligible hysteresis and *V*T of approximately –1.5 V. Besides, TFTs with *L* = 20, 10, 6 and 4 μm have *μ*lin of 9.0, 8.8, 6.3 and 5.3 cm2 V–1 s–1, respectively. **Figure S5**(c) illustrates the *R*total*W–L* plots and their linear fittings. Clearly, the linear fittings match the measured values at each *V*G. *μ*int was calculated to be 10.2 cm2 V–1 s–1 using the slopes of the *R*total*W–L* curves and Equation (S4). *R*c*W* was estimated to be 230 Ω cm (**Figure S5**(d)), which is a low value for OSCs without extra doping1, implying the high effectiveness of carrier injection in C9-DNBDT-NW-based TFTs fabricated using the proposed process.


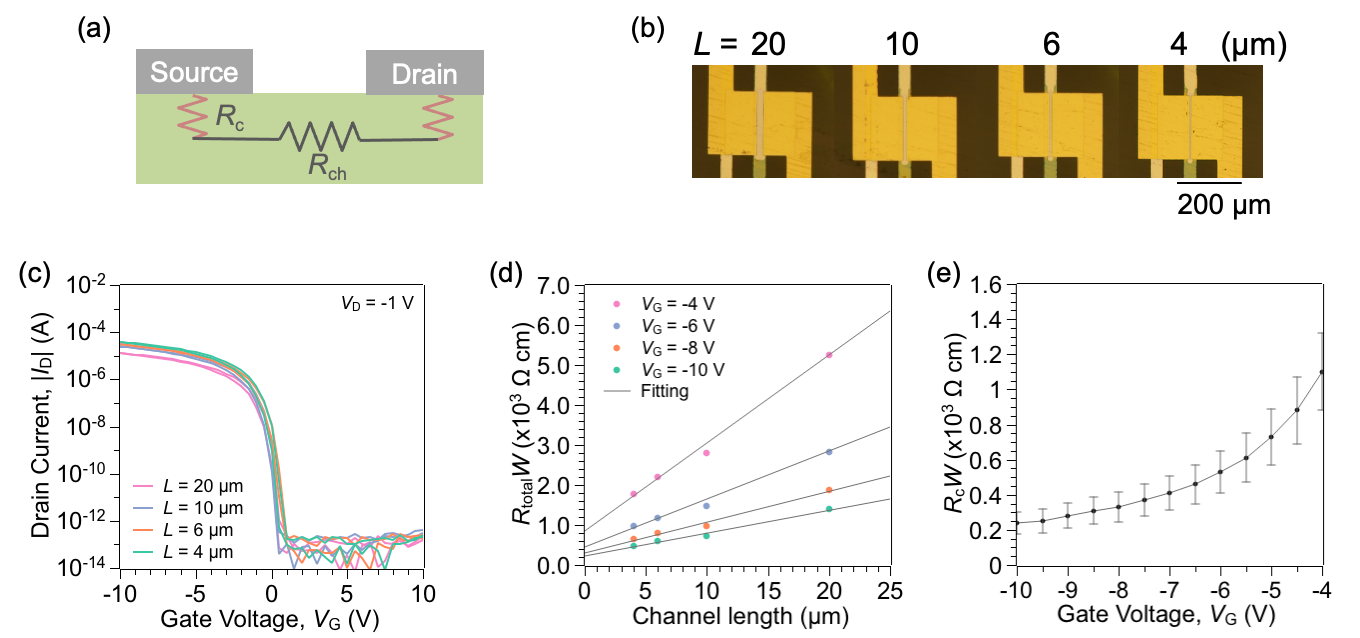


**Figure S5** Contact resistance of C9-DNBDT-NW-based TFTs fabricated by two-step photolithography. (a) Schematic illustration of contact resistance in a TFT. (b) Optical micrograph of TFTs with channel lengths of 20, 10, 6 and 4 μm. (c) Transfer curves of the corresponding TFTs (*V*D = –1 V). (d) TLM plots at different *V*G values. (e) Dependence of *R*c on *V*G


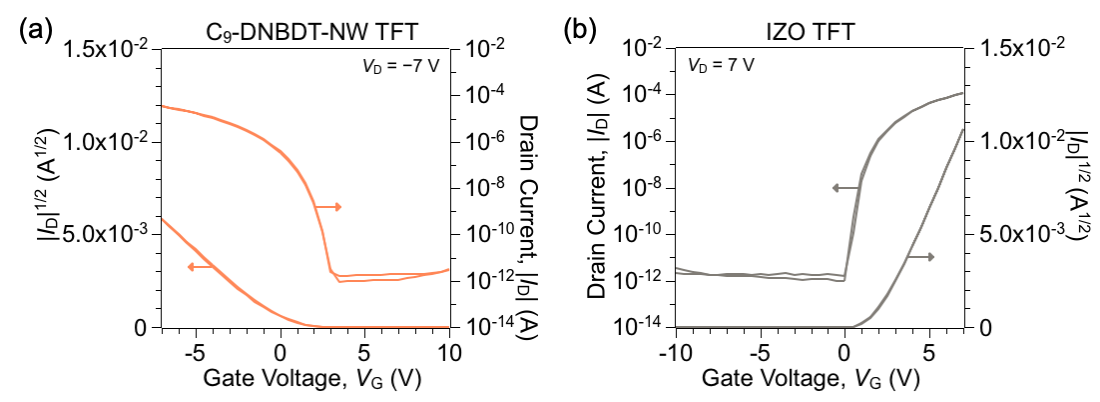


**Figure S6** Transfer characteristics of (a) C9-DNBDT-NW-based TFT at *V*D = –7 V and (b) IZO-based TFTs *V*D = 7 V


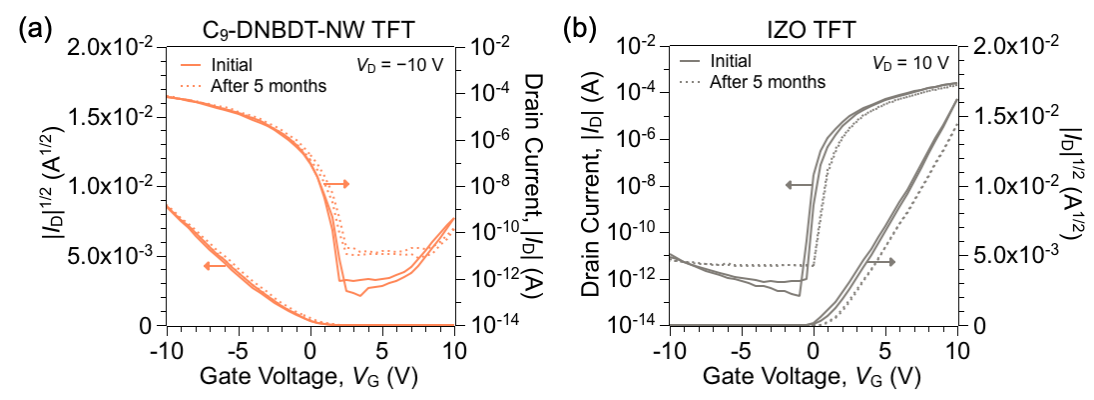


**Figure S7** Transfer characteristics of (a) C9-DNBDT-NW- and (b) IZO-based TFTs before and after exposure to air for 5 months


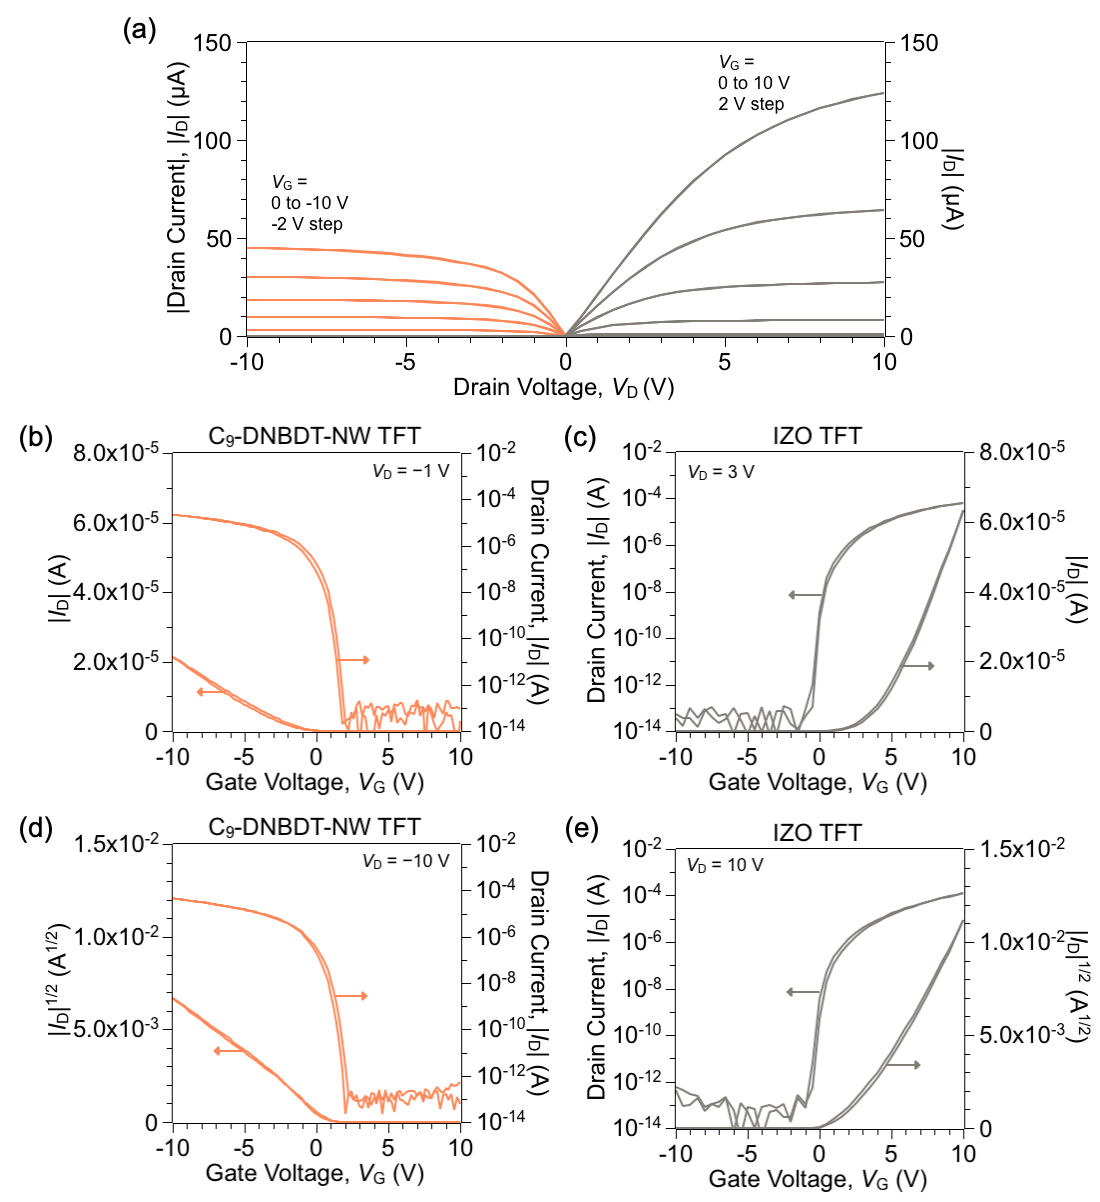


**Figure S8** Electrical performance of TFTs with dimensions of *L* = 4 μm and *ΔL* = 3 μm for the p-channel and *L* = 8 μm and *ΔL* = 1.5 μm for the n-channel. (a) Output performance. (b)–(e) Transfer curves in the linear and saturation regions of TFTs based on C9-DNBDT-NW and IZO


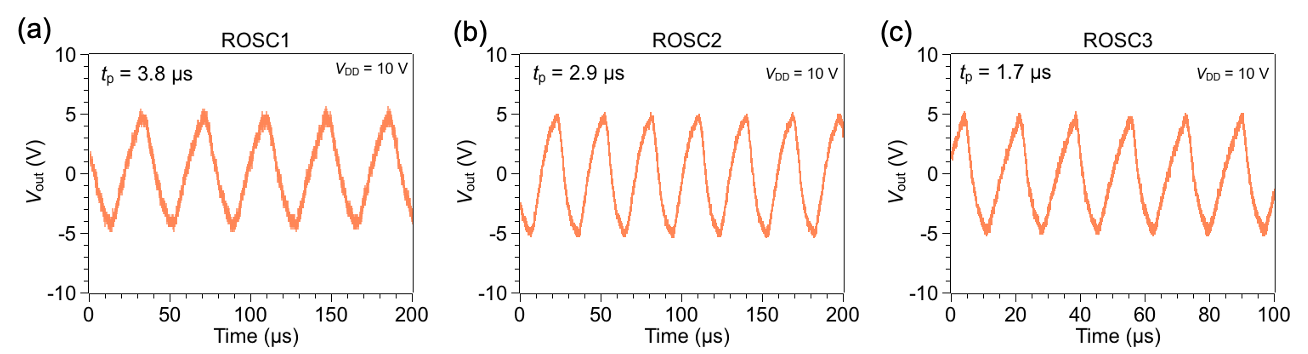


**Figure S9** Output signals of ring oscillators with different dimensions. (a) ROSC1: *L* = 19 μm and *ΔL* = 9 μm for the p-channel and *L* = 24 μm and *ΔL* = 8 μm for the n-channel. (b) ROSC2: *L* = 9 μm and *ΔL* = 9 μm for the p-channel and *L* = 13 μm and *ΔL* = 8.5 μm for the n-channel. (c) ROSC3: *L* = 4 μm and *ΔL* = 5 μm for the p-channel and *L* = 8 μm and *ΔL* = 3.5 μm for the n-channel. In all ring oscillators, *W* = 200 μm and *V*DD = 10 V


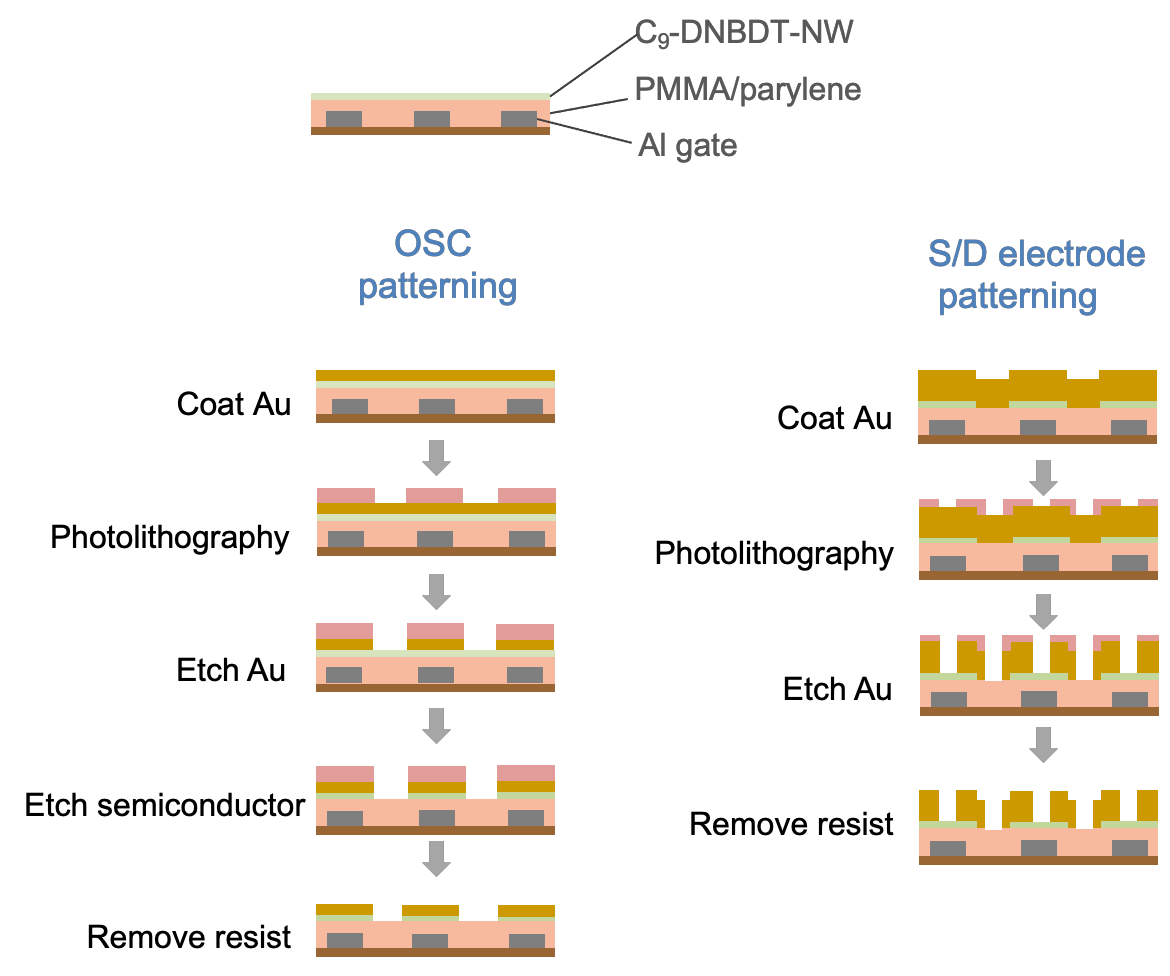


**Figure S10** Schematic illustration of OSC and S/D electrode patterning processes

**References**

1. Yamamura, A. *et al.* Wafer-scale, layer-controlled organic single crystals for high-speed circuit operation. *Sci. Adv.* **4**, eaao5758 (2018).
